# Supplementary material for: Solution combustion synthesis of nanosized WOx: characterization, mechanism and excellent photocatalytic properties
Source: Royal Society of Chemistry journal article supplement (doi:10.1039/c6ra12375a), 2016-01-01
Supplement: c6ra12375a1.pdf [file c6ra12375a1.pdf]

## Supporting Information

### Solution Combustion Synthesis of nanosized $\text{WO}_x$ : Characterization, Mechanism and Excellent Photocatalytic Properties

Pengqi Chen,\* Mingli Qin, Zheng Chen, Baorui Jia, Xuanhui Qu

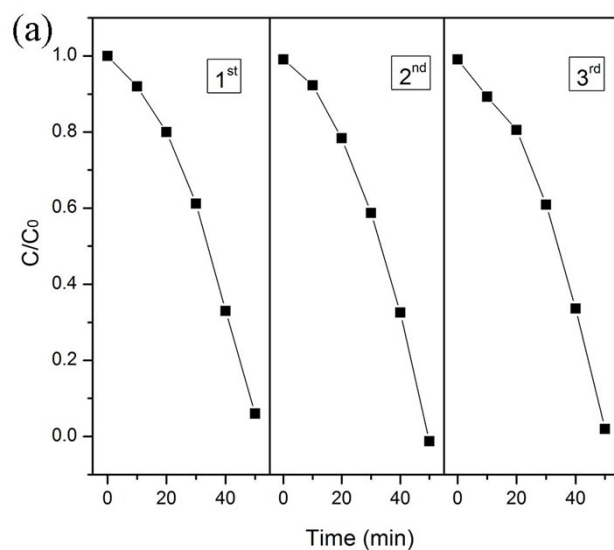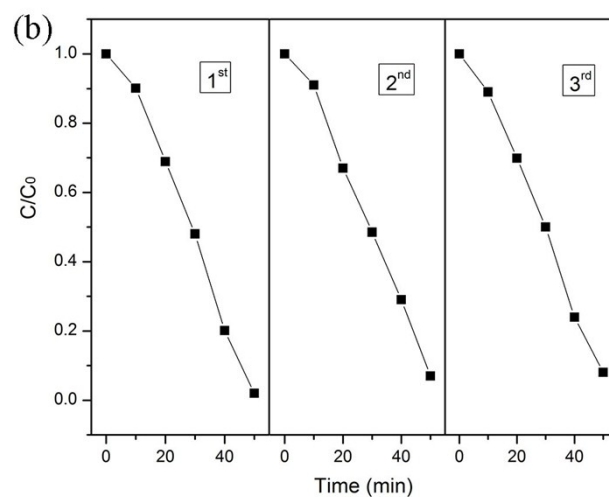

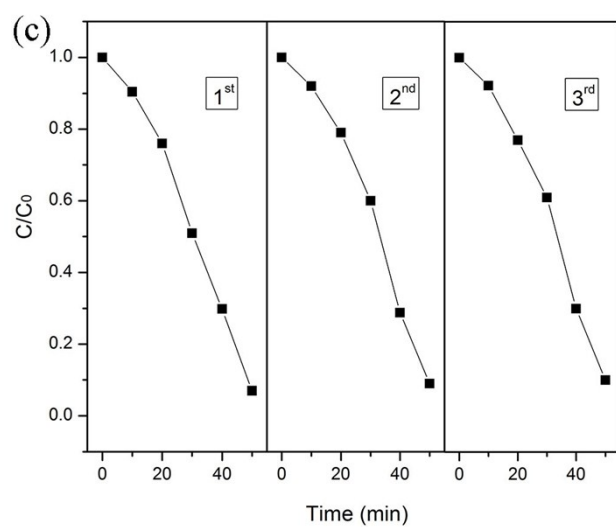

**Figure S1** Recyclability of MB photodegradation of the (a) G3, (b) U3, (UC3) samples.

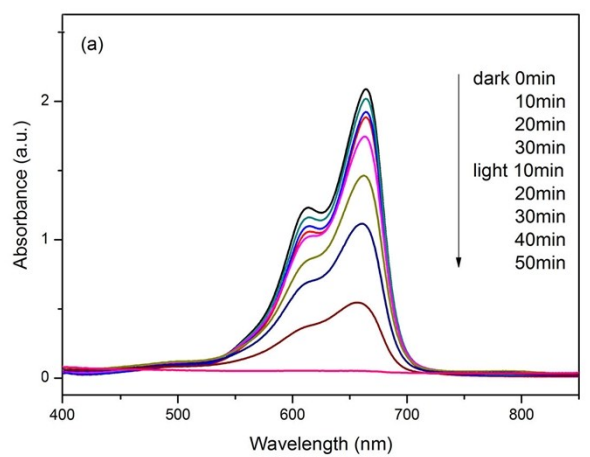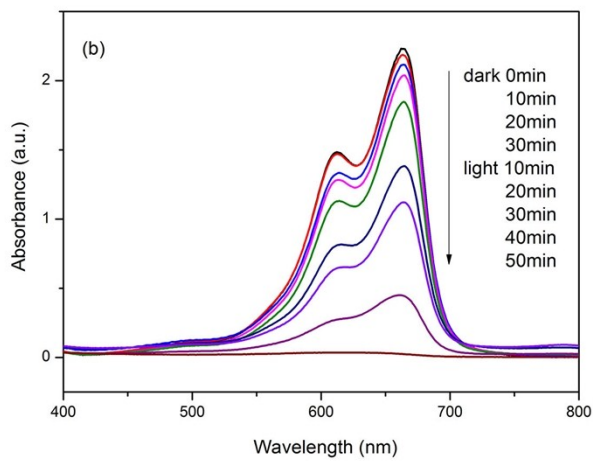

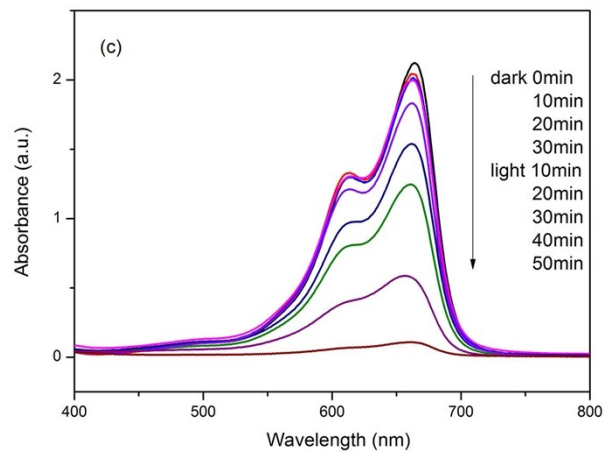

**Figure S2** The changes of time-dependent UV-Vis absorbance spectra in the presence of (a)G3, (b)U3 and (c)UC3 for different times.
